# Supplementary material
Source: publisher figshare collection journal article supplement (https://plos.figshare.com/articles/dataset/_/865091)

Mean percent prediction error (PPE)

Mean PPE, 319 species, 319 individuals, partition 1

100  
50  
0

FC FD FL HC HD HL TaC TaD TaL TiL HAF CSW CLL

Mean PPE, 319 species, 319 individuals, partition 2

100  
50  
0

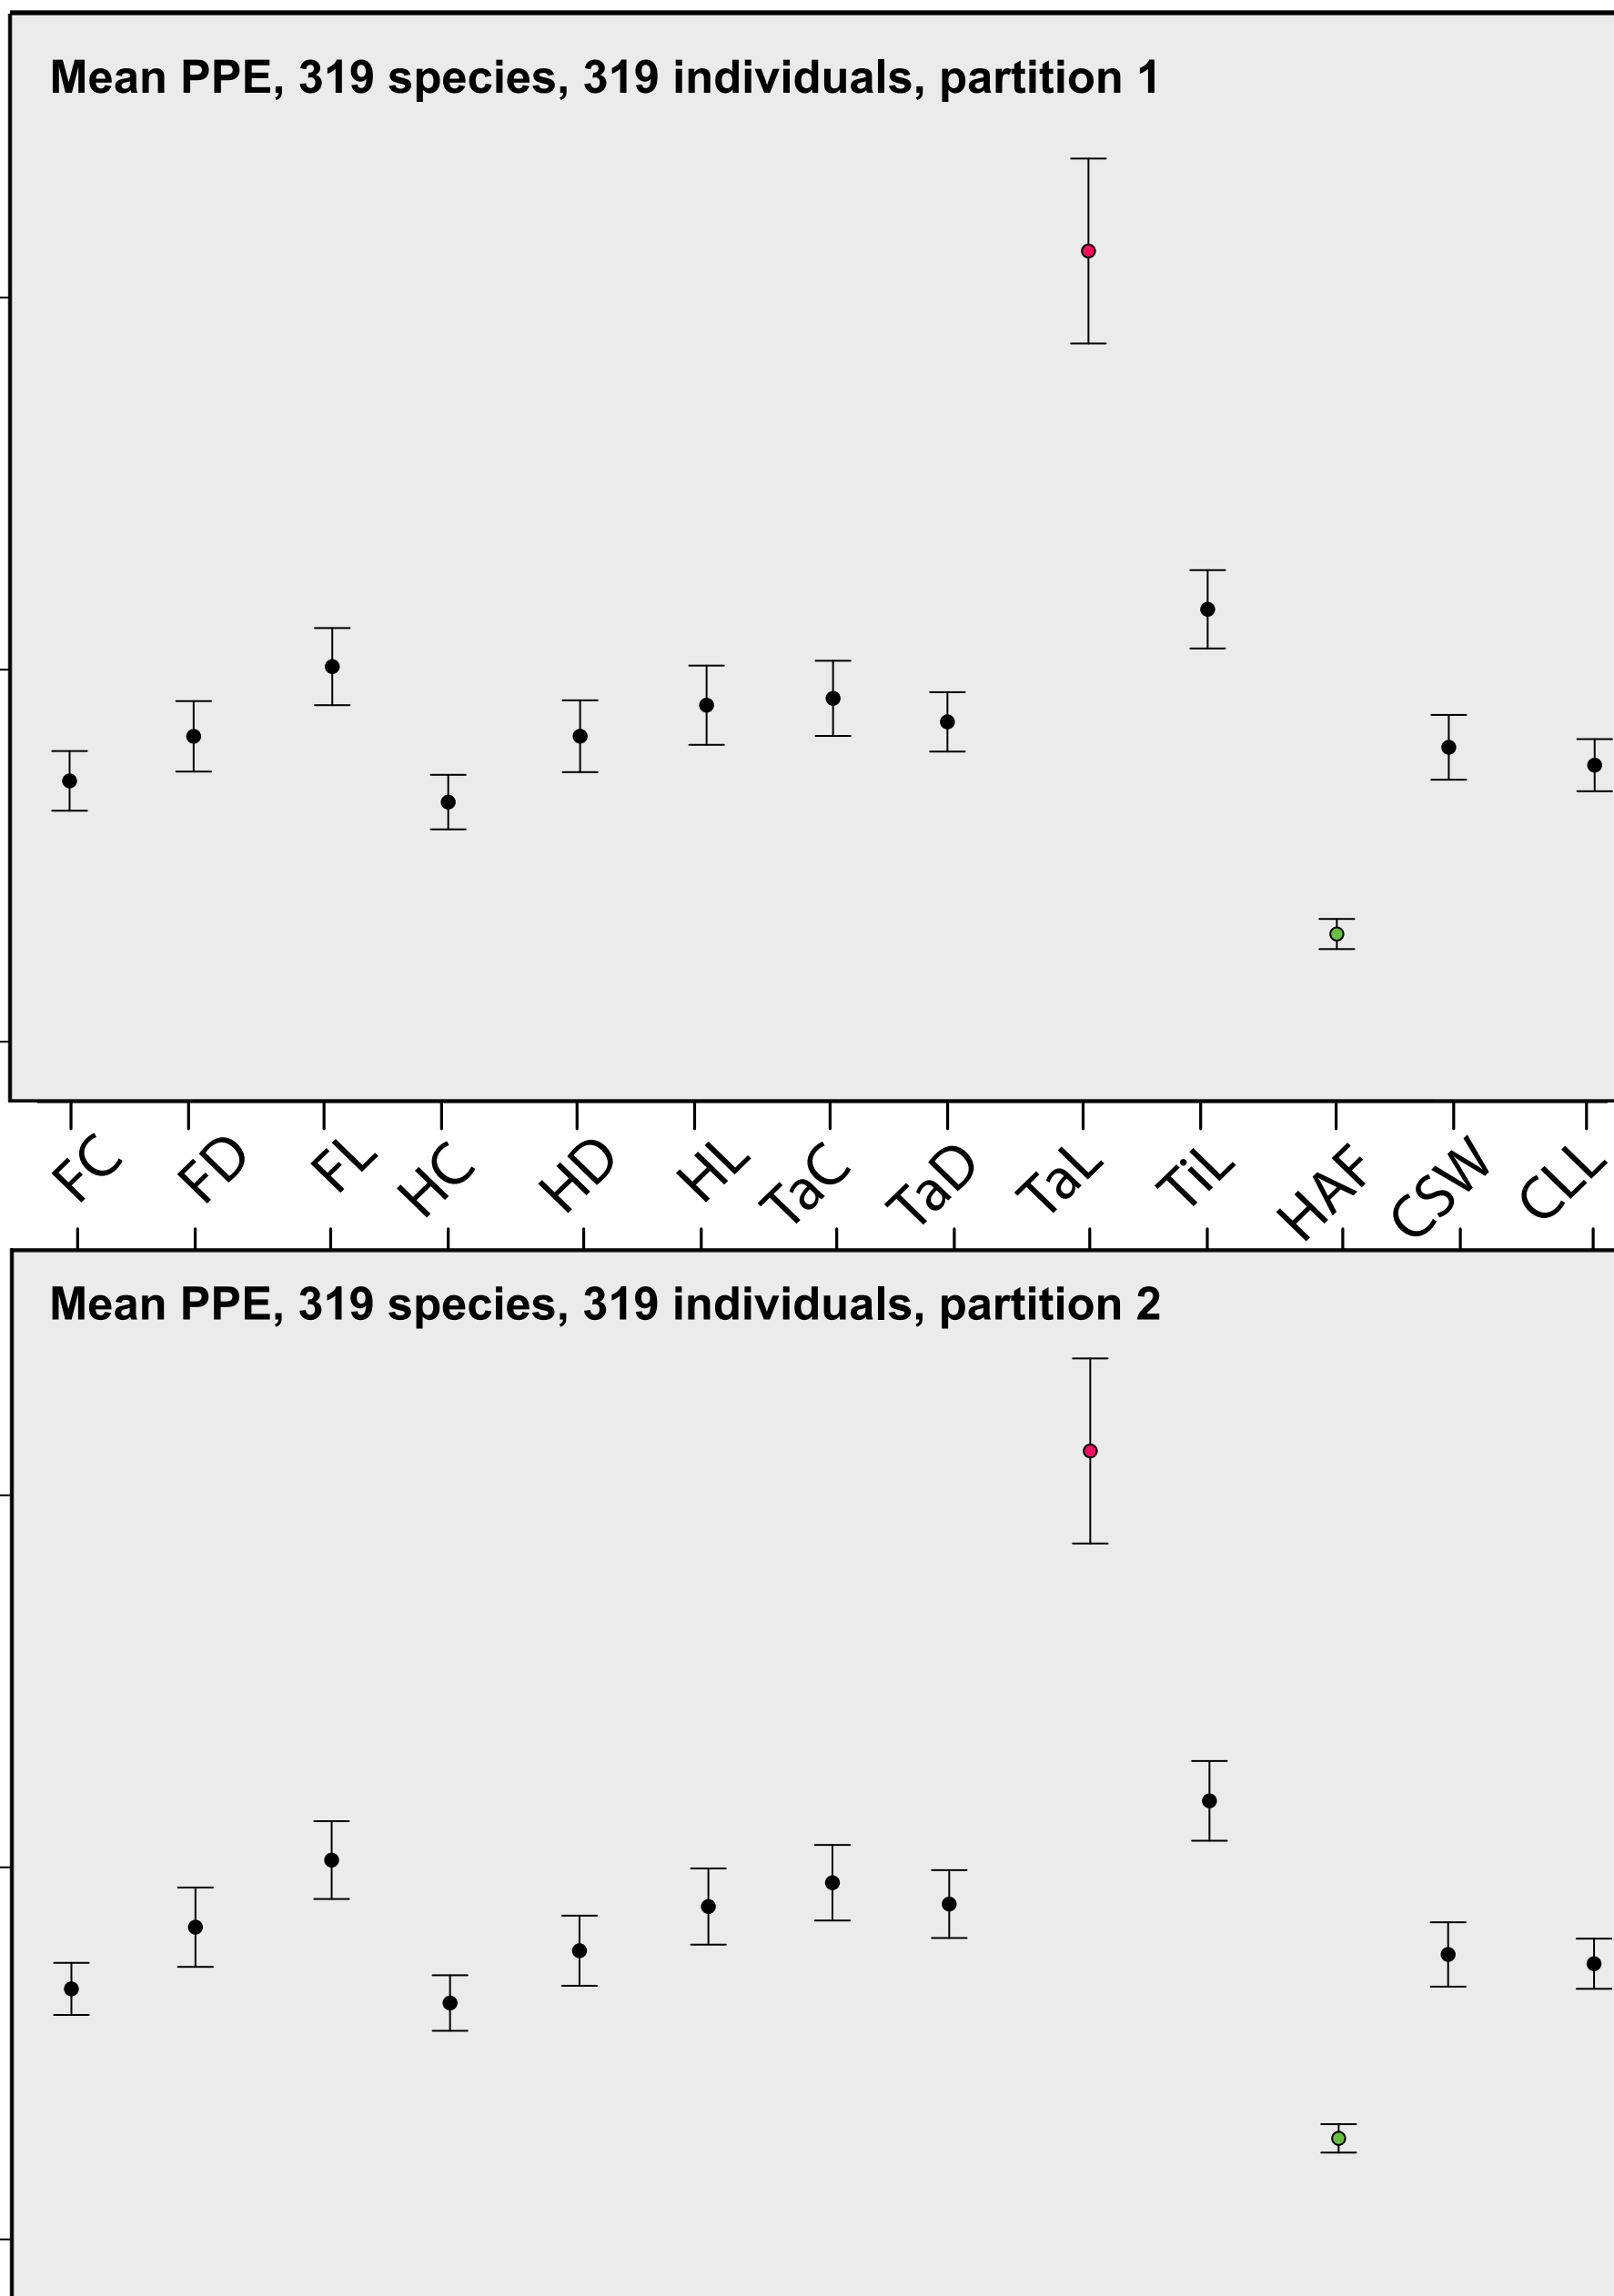

Supplement: Supplementary file [file 1]
